# Supplementary material for: Autologous tumor-immune effusion co-cultures enable ex vivo functional profiling of radiotherapy-immunotherapy combinations
Source: Research Square preprint supplement (doi:10.21203/rs.3.rs-8516163/v1), 2026-01-12
Supplement: Supplementary file 1 [file 62ab60fdfe178bb88cdb8af4.docx]

**Supplementary Fig. 1A Quadruple RT–IO screening shows differential efficacies in PATEC.** Boxplots show tumor cell death (% Zombie Violet™+ tumor cells; fold change relative to matched cntrl (TuCntrl)) in PATEC (EF1–EF4, n = 4) after 72 h of treatment. Each box represents one unique RT–IO regimen. The matrix below the plot indicates which components were included (+) or absent (−) for each combination. Colored dots denote biological replicates. Boxes show median and IQR; whiskers 1.5×IQR. LMM; patient random intercept and replicate set nested within patient; Holm‑adjusted contrasts comparing each combination to RT alone (8 Gy). *p < 0.05; **p < 0.01; ***p < 0.001.

**Supplementary Fig. 1B Component wise effects of RT–IO screening in PATEC.**

Boxplots show tumor cell death (fold change) comparing conditions in which the indicated immunotherapeutic component was absent (–) versus present (+) across the RT–IO screen in PATEC (EF1–EF4, n = 4). Colored dots denote biological replicates. Boxes show median and IQR; whiskers 1.5×IQR. Effect of component inclusion (present vs absent) from a multivariable LMM (FoldChange ~ CTLA4 + STING + TLR7/8 + PD L1 + PD 1 + TIGIT + RT + (1|patient)); Holm. *p < 0.05; **p < 0.01; ***p < 0.001.

**Supplementary Fig. 2 Cellular composition of effusions used for T cell activation.**

Stacked bar charts show the proportion of tumor cells versus total CD45⁺ leukocytes, each bar scaled to 100% (n=9). The adjacent bars illustrate the immune subsets within the CD45⁺ compartment, up to 100%.

**Supplementary Fig. 3 Cytokines without consistent modulation after STING-ago + RT**

Malignant effusion cultures were treated ex vivo for 24 h with treatments (cntrl, STING-Ago, RT, RT + STING-Ago) and cytokine concentrations in supernatants were quantified using a Luminex® multiplex assay (n = 5 effusions). Boxplots show z-score-normalized mean concentrations for RANTES, IFN-β, IFN-γ and IL-10 across treatments. Boxes indicate median and IQR; whiskers 1.5×IQR; dots are means of biological replicates per effusion. Treatments: STING-Ago (10 µM ADU-S100), RT (8 Gy), RT + STING-Ago (8 Gy + 10 µM ADU-S100). Two-way ANOVA; Tukey’s multiple comparisons.

**Supplementary Fig. 4 Correlation between checkpoint induction after STING-Ago + RT and tumor cell death after STING-Ago + RT + CPI in CD8⁺ (left) and CD4⁺ (right) T cells**

Heatmaps show Pearson correlation coefficients (r) between STING-Ago + RT –induced checkpoint expression and Δ tumor cell death for STING-Ago + RT + ICI in PATEC by adding the corresponding checkpoint inhibitor to STING-Ago + RT in the quadruple RT-IO experiment (EF1–EF4, n = 4 PATECs). For each antibody target pair (PD-1–Pembrolizumab, PD-L1/PD-1–Atezolizumab, TIGIT–Tiragolumab, CTLA-4–Ipilimumab), Δ tumor cell death is defined as the difference in tumor death fold change between wells containing that antibody and wells lacking it which definitely have treatments STING-Ago + RT. Checkpoint induction is quantified as log₂ fold change in the frequency of the corresponding checkpoint-positive CD8⁺ (left) or CD4⁺ (right) T cell subset at Day 3 in PATEC (STING-Ago+RT vs cntrl). Tile colors encode the strength and direction of Pearson r (red, positive; blue, negative; scale −1 to 1) and each tile is annotated with r and the corresponding P value (Holm-adjusted across checkpoints).
